# Supplementary material for: Alterations in Social Brain Network Topology at Rest in Children With Autism Spectrum Disorder
Source: Research Square preprint supplement (doi:10.21203/rs.3.rs-1206436/v1), 2022-01-07
Supplement: Supplementary file 1 [file 6f67cad546eaefec8aa42f25.docx]

**Supplementary Table 1. Region of interest**

| **Lobe** | **gyrus** | **Abbreviation** | **label** | | **anatomical description** |
| --- | --- | --- | --- | --- | --- |
| **Frontal Lobe** | SFG, Superior Frontal Gyrus | SFG_R_7_1 / SFG_L_7_1 | 1 | 273 | A8m, medial area 8 |
| SFG_R_7_2 / SFG_L_7_2 | 2 | 272 | A8dl, dorsolateral area 8 |
| SFG_R_7_3 / SFG_L_7_3 | 3 | 271 | A9l, lateral area 9 |
| SFG_R_7_4 / SFG_L_7_4 | 4 | 270 | A6dl, dorsolateral area 6 |
| SFG_R_7_5 / SFG_L_7_5 | 5 | 269 | A6m, medial area 6 |
| SFG_R_7_6 / SFG_L_7_6 | 6 | 268 | A9m,medial area 9 |
| SFG_R_7_7 / SFG_L_7_7 | 7 | 267 | A10m, medial area 10 |
| MFG, Middle Frontal Gyrus | MFG_R_7_1 / MFG_L_7_1 | 8 | 266 | A9/46d, dorsal area 9/46 |
| MFG_R_7_2 / MFG_L_7_2 | 9 | 265 | IFJ, inferior frontal junction |
| MFG_R_7_3 / MFG_L_7_3 | 10 | 264 | A46, area 46 |
| MFG_R_7_4 / MFG_L_7_4 | 11 | 263 | A9/46v, ventral area 9/46 |
| MFG_R_7_5 / MFG_L_7_5 | 12 | 262 | A8vl, ventrolateral area 8 |
| MFG_R_7_6 / MFG_L_7_6 | 13 | 261 | A6vl, ventrolateral area 6 |
| MFG_R_7_7 / MFG_L_7_7 | 14 | 260 | A10l, lateral area10 |
| IFG, Inferior Frontal Gyrus | IFG_R_6_1 / IFG_L_6_1 | 15 | 259 | A44d,dorsal area 44 |
| IFG_R_6_2 / IFG_L_6_2 | 16 | 258 | IFS, inferior frontal sulcus |
| IFG_R_6_3 / IFG_L_6_3 | 17 | 257 | A45c, caudal area 45 |
| IFG_R_6_4 / IFG_L_6_4 | 18 | 256 | A45r, rostral area 45 |
| IFG_R_6_5 / IFG_L_6_5 | 19 | 255 | A44op, opercular area 44 |
| IFG_R_6_6 / IFG_L_6_6 | 20 | 254 | A44v, ventral area 44 |
| OrG, Orbital Gyrus | OrG_R_6_1 / OrG_L_6_1 | 21 | 253 | A14m, medial area 14 |
| OrG_R_6_2 / OrG_L_6_2 | 22 | 252 | A12/47o, orbital area 12/47 |
| OrG_R_6_3 / OrG_L_6_3 | 23 | 251 | A11l, lateral area 11 |
| OrG_R_6_4 / OrG_L_6_4 | 24 | 250 | A11m, medial area 11 |
| OrG_R_6_5 / OrG_L_6_5 | 25 | 249 | A13, area 13 |
| OrG_R_6_6 / OrG_L_6_6 | 26 | 248 | A12/47l, lateral area 12/47 |
| PrG, Precentral Gyrus | PrG_R_6_1 / PrG_L_6_1 | 27 | 247 | A4hf, area 4(head and face region) |
| PrG_R_6_2 / PrG_L_6_2 | 28 | 246 | A6cdl, caudal dorsolateral area 6 |
| PrG_R_6_3 / PrG_L_6_3 | 29 | 245 | A4ul, area 4(upper limb region) |
| PrG_R_6_4 / PrG_L_6_4 | 30 | 244 | A4t, area 4(trunk region) |
| PrG_R_6_5 / PrG_L_6_5 | 31 | 243 | A4tl, area 4(tongue and larynx region) |
| PrG_R_6_6 / PrG_L_6_6 | 32 | 242 | A6cvl, caudal ventrolateral area 6 |
| PCL, Paracentral Lobule | PCL_R_2_1 / PCL_L_2_1 | 33 | 241 | A1/2/3ll, area1/2/3 (lower limb region) |
| PCL_R_2_2 / PCL_L_2_2 | 34 | 240 | A4ll, area 4, (lower limb region) |
| **Temporal Lobe** | STG, Superior Temporal Gyrus | STG_R_6_1 / STG_L_6_1 | 35 | 239 | A38m, medial area 38 |
| STG_R_6_2 / STG_L_6_2 | 36 | 238 | A41/42, area 41/42 |
| STG_R_6_3 / STG_L_6_3 | 37 | 237 | TE1.0 and TE1.2 |
| STG_R_6_4 / STG_L_6_4 | 38 | 236 | A22c, caudal area 22 |
| STG_R_6_5 / STG_L_6_5 | 39 | 235 | A38l, lateral area 38 |
| STG_R_6_6 / STG_L_6_6 | 40 | 234 | A22r, rostral area 22 |
| MTG, Middle Temporal Gyrus | MTG_R_4_1 / MTG_L_4_1 | 41 | 233 | A21c, caudal area 21 |
| MTG_R_4_2 / MTG_L_4_2 | 42 | 232 | A21r, rostral area 21 |
| MTG_R_4_3 / MTG_L_4_3 | 43 | 231 | A37dl, dorsolateral area37 |
| MTG_R_4_4 / MTG_L_4_4 | 44 | 230 | aSTS, anterior superior temporal sulcus |
| ITG, Inferior Temporal Gyrus | ITG_R_7_1 / ITG_L_7_1 | 45 | 229 | A20iv, intermediate ventral area 20 |
| ITG_R_7_2 / ITG_L_7_2 | 46 | 228 | A37elv, extreme lateroventral area37 |
| ITG_R_7_3 / ITG_L_7_3 | 47 | 227 | A20r, rostral area 20 |
| ITG_R_7_4 / ITG_L_7_4 | 48 | 226 | A20il, intermediate lateral area 20 |
| ITG_R_7_5 / ITG_L_7_5 | 49 | 225 | A37vl, ventrolateral area 37 |
| ITG_R_7_6 / ITG_L_7_6 | 50 | 224 | A20cl, caudolateral of area 20 |
| ITG_R_7_7 / ITG_L_7_7 | 51 | 223 | A20cv, caudoventral of area 20 |
| FuG, Fusiform Gyrus | FuG_R_3_1 / FuG_L_3_1 | 52 | 222 | A20rv, rostroventral area 20 |
| FuG_R_3_2 / FuG_L_3_2 | 53 | 221 | A37mv, medioventral area37 |
| FuG_R_3_3 / FuG_L_3_3 | 54 | 220 | A37lv, lateroventral area37 |
| PhG, Parahippocampal Gyrus | PhG_R_6_1 / PhG_L_6_1 | 55 | 219 | A35/36r, rostral area 35/36 |
| PhG_R_6_2 / PhG_L_6_2 | 56 | 218 | A35/36c, caudal area 35/36 |
| PhG_R_6_3 / PhG_L_6_3 | 57 | 217 | TL, area TL (lateral PPHC, posterior parahippocampal gyrus) |
| PhG_R_6_4 / PhG_L_6_4 | 58 | 216 | A28/34, area 28/34 (EC, entorhinal cortex) |
| PhG_R_6_5 / PhG_L_6_5 | 59 | 215 | TI, area TI(temporal agranular insular cortex) |
| PhG_R_6_6 / PhG_L_6_6 | 60 | 214 | TH, area TH (medial PPHC) |
| pSTS, posterior Superior Temporal Sulcus | pSTS_R_2_1 / pSTS_L_2_1 | 61 | 213 | rpSTS, rostroposterior superior temporal sulcus |
| pSTS_R_2_2 / pSTS_L_2_2 | 62 | 212 | cpSTS, caudoposterior superior temporal sulcus |
| **Parietal Lobe** | SPL, Superior Parietal Lobule | SPL_R_5_1 / SPL_L_5_1 | 63 | 211 | A7r, rostral area 7 |
| SPL_R_5_2 / SPL_L_5_2 | 64 | 210 | A7c, caudal area 7 |
| SPL_R_5_3 / SPL_L_5_3 | 65 | 209 | A5l, lateral area 5 |
| SPL_R_5_4 / SPL_L_5_4 | 66 | 208 | A7pc, postcentral area 7 |
| SPL_R_5_5 / SPL_L_5_5 | 67 | 207 | A7ip, intraparietal area 7(hIP3) |
| IPL, Inferior Parietal Lobule | IPL_R_6_1 / IPL_L_6_1 | 68 | 206 | A39c, caudal area 39(PGp) |
| IPL_R_6_2 / IPL_L_6_2 | 69 | 205 | A39rd, rostrodorsal area 39(Hip3) |
| IPL_R_6_3 / IPL_L_6_3 | 70 | 204 | A40rd, rostrodorsal area 40(PFt) |
| IPL_R_6_4 / IPL_L_6_4 | 71 | 203 | A40c, caudal area 40(PFm) |
| IPL_R_6_5 / IPL_L_6_5 | 72 | 202 | A39rv, rostroventral area 39(PGa) |
| IPL_R_6_6 / IPL_L_6_6 | 73 | 201 | A40rv, rostroventral area 40(PFop) |
| Pcun, Precuneus | PCun_R_4_1 / PCun_L_4_1 | 74 | 200 | A7m, medial area 7(PEp) |
| PCun_R_4_2 / PCun_L_4_2 | 75 | 199 | A5m, medial area 5(PEm) |
| PCun_R_4_3 / PCun_L_4_3 | 76 | 198 | dmPOS, dorsomedial parietooccipital sulcus(PEr) |
| PCun_R_4_4 / PCun_L_4_4 | 77 | 197 | A31, area 31 (Lc1) |
| PoG, Postcentral Gyrus | PoG_R_4_1 / PoG_L_4_1 | 78 | 196 | A1/2/3ulhf, area 1/2/3(upper limb, head and face region) |
| PoG_R_4_2 / PoG_L_4_2 | 79 | 195 | A1/2/3tonIa, area 1/2/3(tongue and larynx region) |
| PoG_R_4_3 / PoG_L_4_3 | 80 | 194 | A2, area 2 |
| PoG_R_4_4 / PoG_L_4_4 | 81 | 193 | A1/2/3tru, area1/2/3(trunk region) |
| **Insular Lobe** | INS, Insular Gyrus | INS_R_6_1 / INS_L_6_1 | 82 | 192 | G, hypergranular insula |
| INS_R_6_2 / INS_L_6_2 | 83 | 191 | vIa, ventral agranular insula |
| INS_R_6_3 / INS_L_6_3 | 84 | 190 | dIa, dorsal agranular insula |
| INS_R_6_4 / INS_L_6_4 | 85 | 189 | vId/vIg, ventral dysgranular and granular insula |
| INS_R_6_5 / INS_L_6_5 | 86 | 188 | dIg, dorsal granular insula |
| INS_R_6_6 / INS_L_6_6 | 87 | 187 | dId, dorsal dysgranular insula |
| **Limbic Lobe** | CG, Cingulate Gyrus | CG_R_7_1 / CG_L_7_1 | 88 | 186 | A23d, dorsal area 23 |
| CG_R_7_2 / CG_L_7_2 | 89 | 185 | A24rv, rostroventral area 24 |
| CG_R_7_3 / CG_L_7_3 | 90 | 184 | A32p, pregenual area 32 |
| CG_R_7_4 / CG_L_7_4 | 91 | 183 | A23v, ventral area 23 |
| CG_R_7_5 / CG_L_7_5 | 92 | 182 | A24cd, caudodorsal area 24 |
| CG_R_7_6 / CG_L_7_6 | 93 | 181 | A23c, caudal area 23 |
| CG_R_7_7 / CG_L_7_7 | 94 | 180 | A32sg, subgenual area 32 |
| **Occipital Lobe** | MVOcC*,* MedioVentral Occipital Cortex | MVOcC _R_5_1 / MVOcC _L_5_1 | 95 | 179 | cLinG, caudal lingual gyrus |
| MVOcC _R_5_2 / MVOcC _L_5_2 | 96 | 178 | rCunG, rostral cuneus gyrus |
| MVOcC _R_5_3 / MVOcC _L_5_3 | 97 | 177 | cCunG, caudal cuneus gyrus |
| MVOcC _R_5_4 / MVOcC _L_5_4 | 98 | 176 | rLinG, rostral lingual gyrus |
| MVOcC _R_5_5 / MVOcC _L_5_5 | 99 | 175 | vmPOS,ventromedial parietooccipital sulcus |
| LOcC, lateral Occipital Cortex | LOcC_R_4_1 / LOcC_L_4_1 | 100 | 174 | mOccG, middle occipital gyrus |
| LOcC _R_4_2 / LOcC _L_4_2 | 101 | 173 | V5/MT+, area V5/MT+ |
| LOcC _R_4_3 / LOcC _L_4_3 | 102 | 172 | OPC, occipital polar cortex |
| LOcC_R_4_4 / LOcC_L_4_4 | 103 | 171 | iOccG, inferior occipital gyrus |
| LOcC _R_2_1 / LOcC _L_2_1 | 104 | 170 | msOccG, medial superior occipital gyrus |
| LOcC _R_2_2 / LOcC _L_2_2 | 105 | 169 | lsOccG, lateral superior occipital gyrus |
| **Subcortical Nuclei** | Amyg, Amygdala | Amyg_R_2_1 / Amyg_L_2_1 | 106 | 168 | mAmyg, medial amygdala |
| Amyg_R_2_2 / Amyg_L_2_2 | 107 | 167 | lAmyg, lateral amygdala |
| Hipp, Hippocampus | Hipp_R_2_1 / Hipp_L_2_1 | 108 | 166 | rHipp, rostral hippocampus |
| Hipp_R_2_2 / Hipp_L_2_2 | 109 | 165 | cHipp, caudal hippocampus |
| BG, Basal Ganglia | BG_R_6_1 / BG_L_6_1 | 110 | 164 | vCa, ventral caudate |
| BG_R_6_2 / BG_L_6_2 | 111 | 163 | GP, globus pallidus |
| BG_R_6_3 / BG_L_6_3 | 112 | 162 | NAC, nucleus accumbens |
| BG_R_6_4 / BG_L_6_4 | 113 | 161 | vmPu, ventromedial putamen |
| BG_R_6_5 / BG_L_6_5 | 114 | 160 | dCa, dorsal caudate |
| BG_R_6_6 / BG_L_6_6 | 115 | 159 | dlPu, dorsolateral putamen |
| Tha, Thalamus | Tha_R_8_1 / Tha_L_8_1 | 116 | 158 | mPFtha, medial pre-frontal thalamus |
| Tha_R_8_2 / Tha_L_8_2 | 117 | 157 | mPMtha, pre-motor thalamus |
| Tha_R_8_3 / Tha_L_8_3 | 118 | 156 | Stha, sensory thalamus |
| Tha_R_8_4 / Tha_L_8_4 | 119 | 155 | rTtha, rostral temporal thalamus |
| Tha_R_8_5 / Tha_L_8_5 | 120 | 154 | PPtha, posterior parietal thalamus |
| Tha_R_8_6 / Tha_L_8_6 | 121 | 153 | Otha, occipital thalamus |
| Tha_R_8_7 / Tha_L_8_7 | 122 | 152 | cTtha, caudal temporal thalamus |
| Tha_R_8_8 / Tha_L_8_8 | 123 | 151 | lPFtha, lateral pre-frontal thalamus |
| **Cerebellum** |  | CB_R_I-IV / CB_L_I-IV | 124 | 150 | Cerebellar lobule I-IV |
|  | CB_R_V / CB_L_V | 125 | 149 | Cerebellar lobule IX |
|  | CB_R_VI / CB_L_VI | 126 | 148 | Cerebellar lobule VI |
|  | CB_R_Crus I / CB_L_Crus I | 127 | 147 | Cerebellar Crus I |
|  | CB_R_Crus II / CB_L_Crus II | 128 | 146 | Cerebellar Crus II |
|  | CB_R_VIIb / CB_L_VIIb | 129 | 145 | Cerebellar lobule VIIb |
|  | CB_R_VIIIa / CB_L_VIIIa | 130 | 144 | Cerebellar lobule VIIIa |
|  | CB_R_VIIIb / CB_L_VIIIb | 131 | 143 | Cerebellar lobule VIIIb |
|  | CB_R_IX / CB_L_IX | 132 | 142 | Cerebellar lobule IX |
|  | CB_R_X / CB_L_X | 133 | 141 | Cerebellar lobule X |
|  | Vermis_VI | 134 | | Cerebellar lobule VI, vermis |
|  | Vermis_Crus II | 135 | | Cerebellar Crus II, vermis |
|  | Vermis_VIIb | 136 | | Cerebellar lobule VIIb, vermis |
|  | Vermis_VIIIa | 137 | | Cerebellar lobule VIIIa, vermis |
|  | Vermin_VIIIb | 138 | | Cerebellar lobule VIIIb, vermis |
|  | Vermis_IX | 139 | | Cerebellar lobule IX, vermis |
|  | Vermis_X | 140 | | Cerebellar lobule X, vermis |
| * Vermis_Crus I was excluded in the analysis due to small ROI size. | | |  |  |  |
